# Supplementary material for: PHACTR1, a coronary artery disease risk gene, mediates endothelial dysfunction
Source: Front Immunol. 2022 Aug 25;13:958677. doi: 10.3389/fimmu.2022.958677 (PMC9457086; doi:10.3389/fimmu.2022.958677)
Supplement: Supplementary file 2 [file Table_3.xlsx]

## Sheet: Sheet1
Protein accession	Protein description	Gene name	MW [kDa]	Coverage [%]	MS/MS Counts	Peptides	Unique peptides	MS/MS count Ad_NC	MS/MS count Ad_PHACTR1	Peptides Ad_NC	Peptides Ad_PHACTR1	Unique peptides Ad_NC	Unique peptides Ad_PHACTR1	iBAQ Ad_NC	iBAQ Ad_PHACTR1	Ad_NC	Ad_PHACTR1	Ad_PHACTR1/Ad_NC Ratio
Q9C0D0	Phosphatase and actin regulator 1 OS=Homo sapiens OX=9606 GN=PHACTR1 PE=1 SV=3	PHACTR1	66.307	36	36	18	18	0	36	2	18	2	18	331140	428040000	0.002	1.718	859
Q86UD4	Zinc finger protein 329 OS=Homo sapiens OX=9606 GN=ZNF329 PE=1 SV=2	ZNF329	61.725	1.7	1	1	1	0	1	1	1	1	1	13255	1135800	0.028	1.699	60.679
Q9P219	Protein Daple OS=Homo sapiens OX=9606 GN=CCDC88C PE=1 SV=3	CCDC88C	228.23	1.1	2	2	2	0	2	1	2	1	2	22147	260220	0.193	1.584	8.207
O15144	Actin-related protein 2/3 complex subunit 2 OS=Homo sapiens OX=9606 GN=ARPC2 PE=1 SV=1	ARPC2	34.333	14	4	4	4	0	4	1	4	1	4	123140	1383900	0.201	1.579	7.856
Q13835	Plakophilin-1 OS=Homo sapiens OX=9606 GN=PKP1 PE=1 SV=2	PKP1	82.86	5	2	3	3	0	2	1	3	1	3	56963	608520	0.211	1.572	7.45
P62258	14-3-3 protein epsilon OS=Homo sapiens OX=9606 GN=YWHAE PE=1 SV=1	YWHAE	29.174	12.9	3	3	2	0	3	1	3	1	2	180700	1788600	0.226	1.561	6.907
Q00839	Heterogeneous nuclear ribonucleoprotein U OS=Homo sapiens OX=9606 GN=HNRNPU PE=1 SV=6	HNRNPU	90.583	4.8	6	3	3	3	3	3	3	3	3	311540	2476400	0.275	1.527	5.553
P35580	Myosin-10 OS=Homo sapiens OX=9606 GN=MYH10 PE=1 SV=3	MYH10	229	26.6	53	48	38	5	48	29	48	22	38	1559400	11031000	0.305	1.506	4.938
O00159	Unconventional myosin-Ic OS=Homo sapiens OX=9606 GN=MYO1C PE=1 SV=4	MYO1C	121.68	3.3	3	3	3	0	3	1	3	1	3	110820	749470	0.317	1.498	4.726
P36873	Serine/threonine-protein phosphatase PP1-gamma catalytic subunit OS=Homo sapiens OX=9606 GN=PPP1CC PE=1 SV=1	PPP1CC	36.983	5.3	1	1	1	0	1	1	1	1	1	55415	365480	0.324	1.493	4.608
P11142	Heat shock cognate 71 kDa protein OS=Homo sapiens OX=9606 GN=HSPA8 PE=1 SV=1	HSPA8	70.897	23.7	18	12	9	3	15	8	12	5	9	2210000	12655000	0.366	1.463	3.997
P68133	Actin, alpha skeletal muscle OS=Homo sapiens OX=9606 GN=ACTA1 PE=1 SV=1	ACTA1	42.051	24.9	6	8	1	3	3	8	8	1	1	8189100	41791000	0.403	1.437	3.566
P52907	F-actin-capping protein subunit alpha-1 OS=Homo sapiens OX=9606 GN=CAPZA1 PE=1 SV=3	CAPZA1	32.922	18.9	3	3	3	0	3	1	3	1	3	874460	4086300	0.434	1.416	3.263
Q16666	Gamma-interferon-inducible protein 16 OS=Homo sapiens OX=9606 GN=IFI16 PE=1 SV=3	IFI16	88.255	5.4	4	3	3	1	3	2	3	2	3	183350	803670	0.457	1.4	3.063
P17066	Heat shock 70 kDa protein 6 OS=Homo sapiens OX=9606 GN=HSPA6 PE=1 SV=2	HSPA6	71.027	7.6	4	4	1	1	3	3	4	1	1	665060	2896400	0.46	1.398	3.039
P63261	Actin, cytoplasmic 2 OS=Homo sapiens OX=9606 GN=ACTG1 PE=1 SV=1	ACTG1	41.792	45.3	41	12	5	15	26	11	12	4	5	121360000	497400000	0.483	1.382	2.861
P04275	von Willebrand factor OS=Homo sapiens OX=9606 GN=VWF PE=1 SV=4	VWF	309.26	1.3	2	3	3	0	2	1	3	1	3	47930	190110	0.496	1.373	2.768
Q9NYL9	Tropomodulin-3 OS=Homo sapiens OX=9606 GN=TMOD3 PE=1 SV=1	TMOD3	39.594	5.7	2	2	2	0	2	1	2	1	2	448740	1772800	0.497	1.372	2.761
P35579	Myosin-9 OS=Homo sapiens OX=9606 GN=MYH9 PE=1 SV=4	MYH9	226.53	44	196	78	67	74	122	70	77	60	66	44942000	163880000	0.53	1.349	2.545
P49221	Protein-glutamine gamma-glutamyltransferase 4 OS=Homo sapiens OX=9606 GN=TGM4 PE=1 SV=2	TGM4	77.144	1.3	1	1	1	0	1	1	1	1	1	64098	216610	0.562	1.326	2.359
P05121	Plasminogen activator inhibitor 1 OS=Homo sapiens OX=9606 GN=SERPINE1 PE=1 SV=1	SERPINE1	45.059	17.9	6	5	5	3	3	5	4	5	4	2084400	6901400	0.571	1.32	2.312
P67809	Y-box-binding protein 1 OS=Homo sapiens OX=9606 GN=YBX1 PE=1 SV=3	YBX1	35.924	14.8	3	3	2	0	3	2	3	1	2	780010	2557300	0.575	1.317	2.29
Q14764	Major vault protein OS=Homo sapiens OX=9606 GN=MVP PE=1 SV=4	MVP	99.326	2.4	2	2	2	0	2	1	2	1	2	81361	266370	0.576	1.317	2.286
P98175	RNA-binding protein 10 OS=Homo sapiens OX=9606 GN=RBM10 PE=1 SV=3	RBM10	103.53	7	7	5	5	2	5	4	5	4	5	707400	2241200	0.591	1.307	2.212
P67936	Tropomyosin alpha-4 chain OS=Homo sapiens OX=9606 GN=TPM4 PE=1 SV=3	TPM4	28.521	19.8	9	7	4	4	5	6	6	4	3	4881200	15194000	0.599	1.301	2.172
P15880	40S ribosomal protein S2 OS=Homo sapiens OX=9606 GN=RPS2 PE=1 SV=2	RPS2	31.324	8.2	4	2	2	2	2	2	2	2	2	859090	2582800	0.615	1.29	2.098
P62241	40S ribosomal protein S8 OS=Homo sapiens OX=9606 GN=RPS8 PE=1 SV=2	RPS8	24.205	13.5	3	2	2	1	2	1	2	1	2	1097200	3226000	0.625	1.283	2.053
P16989	Y-box-binding protein 3 OS=Homo sapiens OX=9606 GN=YBX3 PE=1 SV=4	YBX3	40.089	15.1	2	3	2	0	2	2	3	1	2	359870	1056000	0.626	1.282	2.048
P11021	Endoplasmic reticulum chaperone BiP OS=Homo sapiens OX=9606 GN=HSPA5 PE=1 SV=2	HSPA5	72.332	13	5	7	6	0	5	5	7	4	6	1002100	2879800	0.636	1.275	2.005
Q5VSP4	Putative lipocalin 1-like protein 1 OS=Homo sapiens OX=9606 GN=LCN1P1 PE=5 SV=1	LCN1P1	17.918	6.8	1	1	1	0	1	1	1	1	1	643710	1823400	0.642	1.271	1.98
P01024	Complement C3 OS=Homo sapiens OX=9606 GN=C3 PE=1 SV=2	C3	187.15	1	2	1	1	1	1	1	1	1	1	128250	361810	0.644	1.269	1.97
P11161	E3 SUMO-protein ligase EGR2 OS=Homo sapiens OX=9606 GN=EGR2 PE=1 SV=3	EGR2	50.301	2.3	3	1	1	2	1	1	1	1	1	1192800	3309600	0.652	1.264	1.939
O60506	Heterogeneous nuclear ribonucleoprotein Q OS=Homo sapiens OX=9606 GN=SYNCRIP PE=1 SV=2	SYNCRIP	69.602	3.5	2	2	2	0	2	1	2	1	2	129470	349820	0.665	1.255	1.887
P62987	Ubiquitin-60S ribosomal protein L40 OS=Homo sapiens OX=9606 GN=UBA52 PE=1 SV=2	UBA52	14.728	12.5	2	1	1	1	1	1	1	1	1	6181900	16596000	0.668	1.252	1.874
P62805	Histone H4 OS=Homo sapiens OX=9606 GN=H4C1 PE=1 SV=2	H4C1	11.367	21.4	2	2	2	0	2	1	2	1	2	2538100	6578900	0.685	1.24	1.81
Q9BQE3	Tubulin alpha-1C chain OS=Homo sapiens OX=9606 GN=TUBA1C PE=1 SV=1	TUBA1C	49.895	28.5	15	9	9	4	11	7	9	7	9	7083200	17795000	0.701	1.23	1.755
Q5JNZ5	Putative 40S ribosomal protein S26-like 1 OS=Homo sapiens OX=9606 GN=RPS26P11 PE=5 SV=1	RPS26P11	13.002	7.8	2	1	1	1	1	1	1	1	1	1697900	4250000	0.703	1.228	1.747
P11940	Polyadenylate-binding protein 1 OS=Homo sapiens OX=9606 GN=PABPC1 PE=1 SV=2	PABPC1	70.67	12.4	5	6	6	0	5	4	6	4	6	749520	1857700	0.708	1.225	1.73
P12236	ADP/ATP translocase 3 OS=Homo sapiens OX=9606 GN=SLC25A6 PE=1 SV=4	SLC25A6	32.866	10.1	2	3	3	1	1	2	3	2	3	2624100	6370100	0.718	1.217	1.695
Q12905	Interleukin enhancer-binding factor 2 OS=Homo sapiens OX=9606 GN=ILF2 PE=1 SV=2	ILF2	43.062	2.6	1	1	1	0	1	1	1	1	1	686040	1661100	0.72	1.217	1.69
A0A075B6R9	Probable non-functional immunoglobulin kappa variable 2D-24 OS=Homo sapiens OX=9606 GN=IGKV2D-24 PE=1 SV=1	IGKV2D-24	13.079	24.2	2	3	2	1	1	3	3	2	2	105490000	254360000	0.722	1.215	1.683
Q07065	Cytoskeleton-associated protein 4 OS=Homo sapiens OX=9606 GN=CKAP4 PE=1 SV=2	CKAP4	66.022	3.2	2	2	2	1	1	2	2	2	2	177160	423180	0.727	1.212	1.667
P46940	Ras GTPase-activating-like protein IQGAP1 OS=Homo sapiens OX=9606 GN=IQGAP1 PE=1 SV=1	IQGAP1	189.25	0.8	0	1	1	0	0	1	1	1	1	42281	97873	0.743	1.2	1.615
P07437	Tubulin beta chain OS=Homo sapiens OX=9606 GN=TUBB PE=1 SV=2	TUBB	49.67	22.3	12	7	7	4	8	6	7	6	7	4285700	9578800	0.761	1.188	1.561
P39023	60S ribosomal protein L3 OS=Homo sapiens OX=9606 GN=RPL3 PE=1 SV=2	RPL3	46.108	5.2	4	2	2	2	2	2	2	2	2	1312700	2936900	0.761	1.188	1.561
P51114	Fragile X mental retardation syndrome-related protein 1 OS=Homo sapiens OX=9606 GN=FXR1 PE=1 SV=3	FXR1	69.72	5.3	3	2	2	1	2	2	2	2	2	428140	954670	0.762	1.187	1.558
P06753	Tropomyosin alpha-3 chain OS=Homo sapiens OX=9606 GN=TPM3 PE=1 SV=2	TPM3	32.95	6.7	1	2	1	0	1	2	2	1	1	513470	1136600	0.766	1.184	1.546
Q12874	Splicing factor 3A subunit 3 OS=Homo sapiens OX=9606 GN=SF3A3 PE=1 SV=1	SF3A3	58.848	1.8	1	1	1	0	1	1	1	1	1	130960	288700	0.768	1.183	1.54
Q96I25	Splicing factor 45 OS=Homo sapiens OX=9606 GN=RBM17 PE=1 SV=1	RBM17	44.961	4.5	2	2	2	0	2	1	2	1	2	521580	1133300	0.776	1.177	1.517
P08670	Vimentin OS=Homo sapiens OX=9606 GN=VIM PE=1 SV=4	VIM	53.651	45.5	37	21	19	15	22	18	21	16	19	34706000	75111000	0.778	1.176	1.512
O75533	Splicing factor 3B subunit 1 OS=Homo sapiens OX=9606 GN=SF3B1 PE=1 SV=3	SF3B1	145.83	6.2	4	5	5	0	4	3	5	3	5	250020	538460	0.781	1.174	1.503
O75390	Citrate synthase, mitochondrial OS=Homo sapiens OX=9606 GN=CS PE=1 SV=2	CS	51.712	3	0	1	1	0	0	0	1	0	1	0	1885500		0.86	1000
Q5T9L3	Protein wntless homolog OS=Homo sapiens OX=9606 GN=WLS PE=1 SV=2	WLS	62.253	2.2	1	1	1	0	1	0	1	0	1	0	1396400		0.86	1000
P09661	U2 small nuclear ribonucleoprotein A' OS=Homo sapiens OX=9606 GN=SNRPA1 PE=1 SV=2	SNRPA1	28.415	3.1	1	1	1	0	1	0	1	0	1	0	983020		0.86	1000
P12883	Myosin-7 OS=Homo sapiens OX=9606 GN=MYH7 PE=1 SV=5	MYH7	223.09	0.5	1	1	1	0	1	0	1	0	1	0	657670		0.86	1000
Q9H4M9	EH domain-containing protein 1 OS=Homo sapiens OX=9606 GN=EHD1 PE=1 SV=2	EHD1	60.626	1.7	2	1	1	1	1	1	1	1	1	0	529200		0.86	1000
O00237	E3 ubiquitin-protein ligase RNF103 OS=Homo sapiens OX=9606 GN=RNF103 PE=1 SV=1	RNF103	79.404	2.6	1	1	1	0	1	0	1	0	1	0	461850		0.86	1000
P38646	Stress-70 protein, mitochondrial OS=Homo sapiens OX=9606 GN=HSPA9 PE=1 SV=2	HSPA9	73.68	1.3	2	1	1	1	1	1	1	1	1	0	357990		0.86	1000
Q16610	Extracellular matrix protein 1 OS=Homo sapiens OX=9606 GN=ECM1 PE=1 SV=2	ECM1	60.673	2.4	1	1	1	0	1	0	1	0	1	0	298540		0.86	1000
P52272	Heterogeneous nuclear ribonucleoprotein M OS=Homo sapiens OX=9606 GN=HNRNPM PE=1 SV=3	HNRNPM	77.515	3.2	1	1	1	0	1	0	1	0	1	0	292490		0.86	1000
Q9ULE3	DENN domain-containing protein 2A OS=Homo sapiens OX=9606 GN=DENND2A PE=1 SV=4	DENND2A	113.85	3	0	2	2	0	0	1	2	1	2	0	291720		0.86	1000
P34931	Heat shock 70 kDa protein 1-like OS=Homo sapiens OX=9606 GN=HSPA1L PE=1 SV=2	HSPA1L	70.374	8.4	1	4	0	0	1	2	4	0	0	0	263270		0.86	1000
Q9Y2I6	Ninein-like protein OS=Homo sapiens OX=9606 GN=NINL PE=1 SV=2	NINL	156.34	1	1	1	1	0	1	0	1	0	1	0	234240		0.86	1000
Q9BUA3	Spindlin interactor and repressor of chromatin-binding protein OS=Homo sapiens OX=9606 GN=SPINDOC PE=1 SV=3	SPINDOC	41.036	4.7	1	1	1	0	1	0	1	0	1	0	195300		0.86	1000
Q9Y224	RNA transcription, translation and transport factor protein OS=Homo sapiens OX=9606 GN=RTRAF PE=1 SV=1	RTRAF	28.068	5.3	0	1	1	0	0	0	1	0	1	0	157220		0.86	1000
P62191	26S proteasome regulatory subunit 4 OS=Homo sapiens OX=9606 GN=PSMC1 PE=1 SV=1	PSMC1	49.184	2.7	0	1	1	0	0	0	1	0	1	0	129220		0.86	1000
Q13200	26S proteasome non-ATPase regulatory subunit 2 OS=Homo sapiens OX=9606 GN=PSMD2 PE=1 SV=3	PSMD2	100.2	1.3	1	1	1	0	1	0	1	0	1	0	112990		0.86	1000
P31040	Succinate dehydrogenase [ubiquinone] flavoprotein subunit, mitochondrial OS=Homo sapiens OX=9606 GN=SDHA PE=1 SV=2	SDHA	72.691	1.7	0	1	1	0	0	0	1	0	1	0	82378		0.86	1000
Q9P2E9	Ribosome-binding protein 1 OS=Homo sapiens OX=9606 GN=RRBP1 PE=1 SV=5	RRBP1	152.45	0.6	1	1	1	0	1	0	1	0	1	0	53604		0.86	1000
Q8N7H5	RNA polymerase II-associated factor 1 homolog OS=Homo sapiens OX=9606 GN=PAF1 PE=1 SV=2	PAF1	59.975	3.8	0	1	1	0	0	0	1	0	1	0	27498		0.86	1000
Q00325	Phosphate carrier protein, mitochondrial OS=Homo sapiens OX=9606 GN=SLC25A3 PE=1 SV=2	SLC25A3	40.094	3.3	1	1	1	0	1	1	1	1	1	1253100	2653700	0.79	1.168	1.478
O95810	Caveolae-associated protein 2 OS=Homo sapiens OX=9606 GN=CAVIN2 PE=1 SV=3	CAVIN2	47.173	10.8	5	4	4	3	2	3	3	3	3	1780500	3745700	0.793	1.165	1.469
O94832	Unconventional myosin-Id OS=Homo sapiens OX=9606 GN=MYO1D PE=1 SV=2	MYO1D	116.2	0.9	1	1	1	0	1	1	1	1	1	79102	164460	0.8	1.161	1.451
P55072	Transitional endoplasmic reticulum ATPase OS=Homo sapiens OX=9606 GN=VCP PE=1 SV=4	VCP	89.321	7.7	4	4	4	1	3	3	4	3	4	615460	1274200	0.802	1.159	1.445
O43795	Unconventional myosin-Ib OS=Homo sapiens OX=9606 GN=MYO1B PE=1 SV=3	MYO1B	131.98	2.6	2	2	2	0	2	1	2	1	2	106520	217870	0.808	1.155	1.429
P38919	Eukaryotic initiation factor 4A-III OS=Homo sapiens OX=9606 GN=EIF4A3 PE=1 SV=4	EIF4A3	46.871	4.9	2	2	2	0	2	2	2	2	2	492450	1002300	0.811	1.153	1.422
Q86XH1	Dynein regulatory complex protein 11 OS=Homo sapiens OX=9606 GN=IQCA1 PE=2 SV=1	IQCA1	95.34	0.9	1	1	1	0	1	1	1	1	1	82165	165380	0.817	1.148	1.405
O43143	Pre-mRNA-splicing factor ATP-dependent RNA helicase DHX15 OS=Homo sapiens OX=9606 GN=DHX15 PE=1 SV=2	DHX15	90.932	8.2	6	5	5	0	6	4	5	4	5	988800	1947600	0.829	1.14	1.375
Q8WWY3	U4/U6 small nuclear ribonucleoprotein Prp31 OS=Homo sapiens OX=9606 GN=PRPF31 PE=1 SV=2	PRPF31	55.455	2.2	1	1	1	0	1	1	1	1	1	227860	445020	0.834	1.137	1.363
P47755	F-actin-capping protein subunit alpha-2 OS=Homo sapiens OX=9606 GN=CAPZA2 PE=1 SV=3	CAPZA2	32.949	8	2	2	2	0	2	2	2	2	2	1137600	2204300	0.838	1.134	1.353
O15523	ATP-dependent RNA helicase DDX3Y OS=Homo sapiens OX=9606 GN=DDX3Y PE=1 SV=2	DDX3Y	73.153	8	7	5	5	3	4	3	5	3	5	1421300	2735100	0.842	1.131	1.343
P04406	Glyceraldehyde-3-phosphate dehydrogenase OS=Homo sapiens OX=9606 GN=GAPDH PE=1 SV=3	GAPDH	36.053	9.3	1	3	3	0	1	3	3	3	3	1169300	2221400	0.849	1.126	1.326
P09874	Poly [ADP-ribose] polymerase 1 OS=Homo sapiens OX=9606 GN=PARP1 PE=1 SV=4	PARP1	113.08	2.7	2	2	2	1	1	2	2	2	2	263610	499150	0.851	1.125	1.322
Q99880	Histone H2B type 1-L OS=Homo sapiens OX=9606 GN=H2BC13 PE=1 SV=3	H2BC13	13.952	23.8	2	3	3	0	2	3	3	3	3	11907000	22068000	0.863	1.117	1.294
P61978	Heterogeneous nuclear ribonucleoprotein K OS=Homo sapiens OX=9606 GN=HNRNPK PE=1 SV=1	HNRNPK	50.976	26.1	18	9	9	9	9	8	9	8	9	9844100	18084000	0.868	1.113	1.282
P19105	Myosin regulatory light chain 12A OS=Homo sapiens OX=9606 GN=MYL12A PE=1 SV=2	MYL12A	19.794	45	16	6	6	7	9	6	6	6	6	48720000	89272000	0.869	1.112	1.28
Q8TEC5	E3 ubiquitin-protein ligase SH3RF2 OS=Homo sapiens OX=9606 GN=SH3RF2 PE=1 SV=3	SH3RF2	79.319	3.4	1	1	1	0	1	1	1	1	1	1871600	3430000	0.869	1.112	1.28
P07814	Bifunctional glutamate/proline--tRNA ligase OS=Homo sapiens OX=9606 GN=EPRS1 PE=1 SV=5	EPRS1	170.59	1.9	2	2	2	0	2	1	2	1	2	75581	137770	0.872	1.11	1.273
Q9Y3Y2	Chromatin target of PRMT1 protein OS=Homo sapiens OX=9606 GN=CHTOP PE=1 SV=2	CHTOP	26.396	5.2	1	1	1	0	1	1	1	1	1	246250	446990	0.875	1.108	1.266
Q15208	Serine/threonine-protein kinase 38 OS=Homo sapiens OX=9606 GN=STK38 PE=1 SV=1	STK38	54.19	14.2	5	4	4	1	4	2	4	2	4	1287300	2312100	0.881	1.104	1.253
Q13813	Spectrin alpha chain, non-erythrocytic 1 OS=Homo sapiens OX=9606 GN=SPTAN1 PE=1 SV=3	SPTAN1	284.54	17	51	32	32	16	35	30	31	30	31	2350900	4207900	0.882	1.103	1.251
P21333	Filamin-A OS=Homo sapiens OX=9606 GN=FLNA PE=1 SV=4	FLNA	280.74	10.2	23	18	16	4	19	14	18	12	16	1224700	2188300	0.883	1.102	1.248
P61247	40S ribosomal protein S3a OS=Homo sapiens OX=9606 GN=RPS3A PE=1 SV=2	RPS3A	29.945	8	3	2	2	1	2	2	2	2	2	918660	1633900	0.886	1.1	1.242
P07910	Heterogeneous nuclear ribonucleoproteins C1/C2 OS=Homo sapiens OX=9606 GN=HNRNPC PE=1 SV=4	HNRNPC	33.67	6.9	3	2	2	1	2	2	2	2	2	1559600	2756800	0.89	1.098	1.234
Q16875	6-phosphofructo-2-kinase/fructose-2,6-bisphosphatase 3 OS=Homo sapiens OX=9606 GN=PFKFB3 PE=1 SV=1	PFKFB3	59.608	11.7	7	6	6	1	6	6	6	6	6	1751000	3054800	0.897	1.093	1.219
Q15007	Pre-mRNA-splicing regulator WTAP OS=Homo sapiens OX=9606 GN=WTAP PE=1 SV=2	WTAP	44.243	11.6	4	3	3	2	2	3	3	3	3	712700	1229000	0.904	1.088	1.204
O00425	Insulin-like growth factor 2 mRNA-binding protein 3 OS=Homo sapiens OX=9606 GN=IGF2BP3 PE=1 SV=2	IGF2BP3	63.704	2.4	1	1	1	0	1	1	1	1	1	179860	306860	0.91	1.084	1.191
Q13435	Splicing factor 3B subunit 2 OS=Homo sapiens OX=9606 GN=SF3B2 PE=1 SV=2	SF3B2	100.23	3.6	3	3	3	2	1	2	3	2	3	650180	1105800	0.912	1.083	1.188
P23458	Tyrosine-protein kinase JAK1 OS=Homo sapiens OX=9606 GN=JAK1 PE=1 SV=2	JAK1	133.28	14	19	13	13	8	11	12	13	12	13	3359900	5649800	0.918	1.078	1.174
O94925	Glutaminase kidney isoform, mitochondrial OS=Homo sapiens OX=9606 GN=GLS PE=1 SV=1	GLS	73.46	1.6	0	1	1	0	0	1	1	1	1	500360	835840	0.922	1.075	1.166
Q01082	Spectrin beta chain, non-erythrocytic 1 OS=Homo sapiens OX=9606 GN=SPTBN1 PE=1 SV=2	SPTBN1	274.61	19.6	56	37	37	21	35	32	36	32	36	2662900	4409900	0.927	1.072	1.156
Q96AG4	Leucine-rich repeat-containing protein 59 OS=Homo sapiens OX=9606 GN=LRRC59 PE=1 SV=1	LRRC59	34.93	3.9	2	1	1	1	1	1	1	1	1	511620	834180	0.936	1.066	1.139
P31943	Heterogeneous nuclear ribonucleoprotein H OS=Homo sapiens OX=9606 GN=HNRNPH1 PE=1 SV=4	HNRNPH1	49.229	11.6	8	4	4	4	4	4	4	4	4	3861400	6247800	0.94	1.062	1.13
P17844	Probable ATP-dependent RNA helicase DDX5 OS=Homo sapiens OX=9606 GN=DDX5 PE=1 SV=1	DDX5	69.147	3.7	0	2	1	0	0	2	2	1	1	117950	190430	0.942	1.062	1.127
P19338	Nucleolin OS=Homo sapiens OX=9606 GN=NCL PE=1 SV=3	NCL	76.613	2.7	2	2	2	1	1	2	2	2	2	433120	698530	0.942	1.061	1.126
Q01804	OTU domain-containing protein 4 OS=Homo sapiens OX=9606 GN=OTUD4 PE=1 SV=4	OTUD4	124.04	1.8	2	1	1	1	1	1	1	1	1	99368	159000	0.947	1.058	1.117
Q6NZI2	Caveolae-associated protein 1 OS=Homo sapiens OX=9606 GN=CAVIN1 PE=1 SV=1	CAVIN1	43.476	18.2	13	5	5	5	8	4	5	4	5	9111400	14541000	0.948	1.057	1.115
O00622	CCN family member 1 OS=Homo sapiens OX=9606 GN=CCN1 PE=1 SV=1	CCN1	42.026	2.6	0	1	1	0	0	1	1	1	1	155080	246920	0.95	1.056	1.112
Q08378	Golgin subfamily A member 3 OS=Homo sapiens OX=9606 GN=GOLGA3 PE=1 SV=2	GOLGA3	167.35	9.7	12	12	12	4	8	10	12	10	12	808650	1280700	0.953	1.054	1.106
P62917	60S ribosomal protein L8 OS=Homo sapiens OX=9606 GN=RPL8 PE=1 SV=2	RPL8	28.024	13.2	4	3	3	1	3	3	3	3	3	2928400	4622200	0.955	1.052	1.102
Q5T749	Keratinocyte proline-rich protein OS=Homo sapiens OX=9606 GN=KPRP PE=1 SV=1	KPRP	64.135	1.6	2	1	1	1	1	1	1	1	1	464370	732650	0.955	1.052	1.102
Q99873	Protein arginine N-methyltransferase 1 OS=Homo sapiens OX=9606 GN=PRMT1 PE=1 SV=3	PRMT1	42.461	6.5	3	2	2	2	1	2	2	2	2	1659200	2615200	0.956	1.052	1.1
P22735	Protein-glutamine gamma-glutamyltransferase K OS=Homo sapiens OX=9606 GN=TGM1 PE=1 SV=4	TGM1	89.786	4.5	4	3	3	2	2	2	3	2	3	303980	478020	0.957	1.051	1.098
Q02978	Mitochondrial 2-oxoglutarate/malate carrier protein OS=Homo sapiens OX=9606 GN=SLC25A11 PE=1 SV=3	SLC25A11	34.061	5.1	1	1	1	0	1	1	1	1	1	212380	331800	0.961	1.048	1.091
Q99878	Histone H2A type 1-J OS=Homo sapiens OX=9606 GN=H2AC14 PE=1 SV=3	H2AC14	13.936	7	1	1	1	1	0	1	1	1	1	12224000	18990000	0.964	1.046	1.085
P46821	Microtubule-associated protein 1B OS=Homo sapiens OX=9606 GN=MAP1B PE=1 SV=2	MAP1B	270.63	3	5	4	4	1	4	4	4	4	4	221350	343680	0.965	1.046	1.084
P18124	60S ribosomal protein L7 OS=Homo sapiens OX=9606 GN=RPL7 PE=1 SV=1	RPL7	29.225	12.1	2	2	2	1	1	2	2	2	2	2072600	3213700	0.965	1.045	1.083
P13639	Elongation factor 2 OS=Homo sapiens OX=9606 GN=EEF2 PE=1 SV=4	EEF2	95.337	2.2	1	2	2	1	0	2	1	2	1	139730	214720	0.971	1.041	1.072
Q15393	Splicing factor 3B subunit 3 OS=Homo sapiens OX=9606 GN=SF3B3 PE=1 SV=4	SF3B3	135.58	5.1	5	5	5	1	4	3	4	3	4	484100	736980	0.976	1.038	1.064
P46776	60S ribosomal protein L27a OS=Homo sapiens OX=9606 GN=RPL27A PE=1 SV=2	RPL27A	16.561	6.8	1	1	1	0	1	1	1	1	1	975070	1472600	0.981	1.034	1.054
P04792	Heat shock protein beta-1 OS=Homo sapiens OX=9606 GN=HSPB1 PE=1 SV=2	HSPB1	22.782	12.7	2	2	2	0	2	2	2	2	2	1344900	2023600	0.983	1.033	1.051
P19474	E3 ubiquitin-protein ligase TRIM21 OS=Homo sapiens OX=9606 GN=TRIM21 PE=1 SV=1	TRIM21	54.169	25.1	32	11	11	16	16	11	11	11	11	41192000	61817000	0.985	1.032	1.048
P09012	U1 small nuclear ribonucleoprotein A OS=Homo sapiens OX=9606 GN=SNRPA PE=1 SV=3	SNRPA	31.279	3.5	2	1	1	1	1	1	1	1	1	611500	909910	0.99	1.028	1.038
P14923	Junction plakoglobin OS=Homo sapiens OX=9606 GN=JUP PE=1 SV=3	JUP	81.744	16.5	18	9	9	8	10	9	9	9	9	2577200	3785700	0.997	1.023	1.026
Q9BQA1	Methylosome protein 50 OS=Homo sapiens OX=9606 GN=WDR77 PE=1 SV=1	WDR77	36.724	35.7	16	6	6	6	10	6	6	6	6	84926000	124110000	1	1.021	1.021
Q6ZVX7	F-box only protein 50 OS=Homo sapiens OX=9606 GN=NCCRP1 PE=1 SV=1	NCCRP1	30.847	10.2	4	3	3	2	2	2	3	2	3	1790800	2620000	1	1.021	1.021
Q9NSC7	Alpha-N-acetylgalactosaminide alpha-2,6-sialyltransferase 1 OS=Homo sapiens OX=9606 GN=ST6GALNAC1 PE=2 SV=1	ST6GALNAC1	68.563	1.2	0	1	1	0	0	1	1	1	1	127720	183860	1.009	1.014	1.005
A2NJV5	Immunoglobulin kappa variable 2-29 OS=Homo sapiens OX=9606 GN=IGKV2-29 PE=3 SV=2	IGKV2-29	13.085	19.2	175	4	1	82	93	4	4	1	1	22467000000	31223000000	1.03	1	0.971
P0DP01	Immunoglobulin heavy variable 1-8 OS=Homo sapiens OX=9606 GN=IGHV1-8 PE=3 SV=1	IGHV1-8	12.992	12.8	1	1	1	1	0	1	1	1	1	2734900	3805400	1.03	1	0.971
Q93100	Phosphorylase b kinase regulatory subunit beta OS=Homo sapiens OX=9606 GN=PHKB PE=1 SV=3	PHKB	124.88	1.8	2	2	2	0	2	1	2	1	2	63121	84556	1.052	0.984	0.935
P62277	40S ribosomal protein S13 OS=Homo sapiens OX=9606 GN=RPS13 PE=1 SV=2	RPS13	17.222	30.5	4	4	4	2	2	2	4	2	4	2765800	3690300	1.055	0.983	0.932
P15924	Desmoplakin OS=Homo sapiens OX=9606 GN=DSP PE=1 SV=3	DSP	331.77	9.3	36	24	24	15	21	19	22	19	22	1297700	1724900	1.057	0.981	0.928
P04075	Fructose-bisphosphate aldolase A OS=Homo sapiens OX=9606 GN=ALDOA PE=1 SV=2	ALDOA	39.42	6	2	2	2	1	1	2	2	2	2	510020	677190	1.058	0.981	0.927
P02751	Fibronectin OS=Homo sapiens OX=9606 GN=FN1 PE=1 SV=5	FN1	272.32	1.2	3	3	3	1	2	3	3	3	3	117460	155640	1.059	0.98	0.925
P62701	40S ribosomal protein S4, X isoform OS=Homo sapiens OX=9606 GN=RPS4X PE=1 SV=2	RPS4X	29.597	11.8	6	4	4	3	3	4	3	4	3	2607200	3435700	1.062	0.977	0.92
O14744	Protein arginine N-methyltransferase 5 OS=Homo sapiens OX=9606 GN=PRMT5 PE=1 SV=4	PRMT5	72.683	42.2	52	23	23	23	29	22	22	22	22	118920000	155630000	1.066	0.974	0.914
P68104	Elongation factor 1-alpha 1 OS=Homo sapiens OX=9606 GN=EEF1A1 PE=1 SV=1	EEF1A1	50.14	16.7	14	6	6	6	8	6	6	6	6	25442000	33251000	1.067	0.974	0.913
Q9Y2W1	Thyroid hormone receptor-associated protein 3 OS=Homo sapiens OX=9606 GN=THRAP3 PE=1 SV=2	THRAP3	108.66	20.9	40	17	17	19	21	16	17	16	17	25468000	33205000	1.069	0.973	0.91
P62753	40S ribosomal protein S6 OS=Homo sapiens OX=9606 GN=RPS6 PE=1 SV=1	RPS6	28.68	4.8	0	1	1	0	0	1	1	1	1	2095300	2723900	1.07	0.972	0.908
P36578	60S ribosomal protein L4 OS=Homo sapiens OX=9606 GN=RPL4 PE=1 SV=5	RPL4	47.697	2.6	1	1	1	0	1	1	1	1	1	1319800	1710100	1.072	0.97	0.905
Q07021	Complement component 1 Q subcomponent-binding protein, mitochondrial OS=Homo sapiens OX=9606 GN=C1QBP PE=1 SV=1	C1QBP	31.362	3.9	2	1	1	1	1	1	1	1	1	1363100	1764600	1.073	0.97	0.904
P69905	Hemoglobin subunit alpha OS=Homo sapiens OX=9606 GN=HBA1 PE=1 SV=2	HBA1	15.257	23.9	2	3	2	1	1	2	2	1	1	15454000	19958000	1.074	0.969	0.902
P27348	14-3-3 protein theta OS=Homo sapiens OX=9606 GN=YWHAQ PE=1 SV=1	YWHAQ	27.764	9.8	2	2	1	1	1	1	2	1	1	683570	870410	1.083	0.963	0.889
P27105	Stomatin OS=Homo sapiens OX=9606 GN=STOM PE=1 SV=3	STOM	31.73	44.1	21	9	9	11	10	9	9	9	9	58726000	73662000	1.092	0.956	0.875
P07355	Annexin A2 OS=Homo sapiens OX=9606 GN=ANXA2 PE=1 SV=2	ANXA2	38.604	32.7	16	9	9	7	9	9	9	9	9	12706000	15929000	1.092	0.956	0.875
P23588	Eukaryotic translation initiation factor 4B OS=Homo sapiens OX=9606 GN=EIF4B PE=1 SV=2	EIF4B	69.15	11.1	9	7	7	5	4	6	7	6	7	6112800	7638700	1.094	0.955	0.873
P60660	Myosin light polypeptide 6 OS=Homo sapiens OX=9606 GN=MYL6 PE=1 SV=2	MYL6	16.93	33.8	6	4	4	2	4	4	4	4	4	21320000	26456000	1.099	0.952	0.866
Q96HS1	Serine/threonine-protein phosphatase PGAM5, mitochondrial OS=Homo sapiens OX=9606 GN=PGAM5 PE=1 SV=2	PGAM5	32.004	25.6	12	7	7	8	4	7	7	7	7	7919300	9809000	1.1	0.951	0.865
P05198	Eukaryotic translation initiation factor 2 subunit 1 OS=Homo sapiens OX=9606 GN=EIF2S1 PE=1 SV=3	EIF2S1	36.112	2.9	2	1	1	1	1	1	1	1	1	272970	337250	1.101	0.95	0.863
Q92841	Probable ATP-dependent RNA helicase DDX17 OS=Homo sapiens OX=9606 GN=DDX17 PE=1 SV=2	DDX17	80.272	3.3	4	2	1	2	2	2	2	1	1	1026100	1233900	1.118	0.939	0.84
Q03135	Caveolin-1 OS=Homo sapiens OX=9606 GN=CAV1 PE=1 SV=4	CAV1	20.471	30.9	15	4	4	8	7	4	4	4	4	130910000	157140000	1.119	0.938	0.838
P55036	26S proteasome non-ATPase regulatory subunit 4 OS=Homo sapiens OX=9606 GN=PSMD4 PE=1 SV=1	PSMD4	40.736	13.5	5	4	4	2	3	2	4	2	4	3144300	3745200	1.124	0.934	0.831
A0A075B6P5	Immunoglobulin kappa variable 2-28 OS=Homo sapiens OX=9606 GN=IGKV2-28 PE=3 SV=1	IGKV2-28	12.957	25.8	2	3	1	1	1	3	3	1	1	2357600	2808300	1.124	0.934	0.831
Q9Y3I0	RNA-splicing ligase RtcB homolog OS=Homo sapiens OX=9606 GN=RTCB PE=1 SV=1	RTCB	55.21	2.8	1	1	1	0	1	1	1	1	1	448410	532090	1.126	0.933	0.829
P01859	Immunoglobulin heavy constant gamma 2 OS=Homo sapiens OX=9606 GN=IGHG2 PE=1 SV=2	IGHG2	35.9	2.8	2	1	1	1	1	1	1	1	1	105030000	123760000	1.13	0.93	0.823
P21291	Cysteine and glycine-rich protein 1 OS=Homo sapiens OX=9606 GN=CSRP1 PE=1 SV=3	CSRP1	20.567	7.8	2	1	1	1	1	1	1	1	1	622450	717450	1.144	0.92	0.804
P49411	Elongation factor Tu, mitochondrial OS=Homo sapiens OX=9606 GN=TUFM PE=1 SV=2	TUFM	49.541	5.3	2	2	2	1	1	2	2	2	2	416100	479540	1.144	0.92	0.804
Q969G5	Caveolae-associated protein 3 OS=Homo sapiens OX=9606 GN=CAVIN3 PE=1 SV=3	CAVIN3	27.701	4.2	2	1	1	1	1	1	1	1	1	702680	795430	1.155	0.913	0.79
P62750	60S ribosomal protein L23a OS=Homo sapiens OX=9606 GN=RPL23A PE=1 SV=1	RPL23A	17.695	12.2	4	2	2	2	2	2	2	2	2	3289700	3701100	1.159	0.91	0.785
P46781	40S ribosomal protein S9 OS=Homo sapiens OX=9606 GN=RPS9 PE=1 SV=3	RPS9	22.591	5.7	2	1	1	1	1	1	1	1	1	1207400	1357500	1.159	0.91	0.785
P01040	Cystatin-A OS=Homo sapiens OX=9606 GN=CSTA PE=1 SV=1	CSTA	11.006	30.6	3	2	2	2	1	2	2	2	2	7916200	8842500	1.163	0.907	0.78
Q9NQ92	Coordinator of PRMT5 and differentiation stimulator OS=Homo sapiens OX=9606 GN=COPRS PE=1 SV=3	COPRS	20.066	6.5	2	1	1	1	1	1	1	1	1	998590	1097900	1.173	0.9	0.767
P62913	60S ribosomal protein L11 OS=Homo sapiens OX=9606 GN=RPL11 PE=1 SV=2	RPL11	20.252	4.5	0	1	1	0	0	1	1	1	1	295070	322080	1.177	0.897	0.762
P62280	40S ribosomal protein S11 OS=Homo sapiens OX=9606 GN=RPS11 PE=1 SV=3	RPS11	18.431	4.4	2	1	1	1	1	1	1	1	1	944210	1028600	1.178	0.896	0.761
P23396	40S ribosomal protein S3 OS=Homo sapiens OX=9606 GN=RPS3 PE=1 SV=2	RPS3	26.688	30.9	10	5	5	4	6	5	5	5	5	9674400	10528000	1.179	0.896	0.76
Q9NYF8	Bcl-2-associated transcription factor 1 OS=Homo sapiens OX=9606 GN=BCLAF1 PE=1 SV=2	BCLAF1	106.12	4.6	4	4	4	2	2	4	3	4	3	2252700	2433100	1.184	0.893	0.754
P06702	Protein S100-A9 OS=Homo sapiens OX=9606 GN=S100A9 PE=1 SV=1	S100A9	13.242	24.6	7	2	2	3	4	2	2	2	2	13149000	13878000	1.198	0.883	0.737
O43290	U4/U6.U5 tri-snRNP-associated protein 1 OS=Homo sapiens OX=9606 GN=SART1 PE=1 SV=1	SART1	90.254	1.4	1	1	1	0	1	1	1	1	1	92411	96739	1.203	0.879	0.731
Q02413	Desmoglein-1 OS=Homo sapiens OX=9606 GN=DSG1 PE=1 SV=2	DSG1	113.75	8.3	10	6	6	6	4	6	6	6	6	2903800	3003700	1.21	0.874	0.722
P61313	60S ribosomal protein L15 OS=Homo sapiens OX=9606 GN=RPL15 PE=1 SV=2	RPL15	24.146	9.3	2	2	2	1	1	2	1	2	1	544120	559860	1.213	0.872	0.719
P05109	Protein S100-A8 OS=Homo sapiens OX=9606 GN=S100A8 PE=1 SV=1	S100A8	10.834	20.4	3	2	2	1	2	2	2	2	2	6889700	7088000	1.214	0.872	0.718
P02545	Prelamin-A/C OS=Homo sapiens OX=9606 GN=LMNA PE=1 SV=1	LMNA	74.139	5.4	5	3	3	3	2	3	3	3	3	351840	353480	1.228	0.862	0.702
P81605	Dermcidin OS=Homo sapiens OX=9606 GN=DCD PE=1 SV=2	DCD	11.284	20	2	2	2	1	1	2	2	2	2	129950000	130500000	1.228	0.861	0.701
P27816	Microtubule-associated protein 4 OS=Homo sapiens OX=9606 GN=MAP4 PE=1 SV=3	MAP4	121	1.3	0	1	1	0	0	1	1	1	1	73966	72602	1.242	0.852	0.686
Q9NZT1	Calmodulin-like protein 5 OS=Homo sapiens OX=9606 GN=CALML5 PE=1 SV=2	CALML5	15.892	9.6	4	2	2	2	2	2	2	2	2	2285000	2199600	1.254	0.843	0.672
Q92499	ATP-dependent RNA helicase DDX1 OS=Homo sapiens OX=9606 GN=DDX1 PE=1 SV=2	DDX1	82.431	1.1	2	1	1	1	1	1	1	1	1	186430	176080	1.266	0.835	0.66
P04040	Catalase OS=Homo sapiens OX=9606 GN=CAT PE=1 SV=3	CAT	59.755	5.9	5	3	3	2	3	3	3	3	3	752650	707900	1.269	0.833	0.656
P46779	60S ribosomal protein L28 OS=Homo sapiens OX=9606 GN=RPL28 PE=1 SV=3	RPL28	15.747	8	1	1	1	1	0	1	1	1	1	1237000	1153500	1.274	0.829	0.651
Q06830	Peroxiredoxin-1 OS=Homo sapiens OX=9606 GN=PRDX1 PE=1 SV=1	PRDX1	22.11	16.1	6	3	3	3	3	3	3	3	3	13906000	12949000	1.275	0.829	0.65
P29508	Serpin B3 OS=Homo sapiens OX=9606 GN=SERPINB3 PE=1 SV=2	SERPINB3	44.564	9	3	3	3	2	1	3	2	3	2	1085200	998470	1.282	0.824	0.643
P22894	Neutrophil collagenase OS=Homo sapiens OX=9606 GN=MMP8 PE=1 SV=1	MMP8	53.411	4.3	1	1	1	1	0	1	1	1	1	32850000	29437000	1.298	0.812	0.626
P51636	Caveolin-2 OS=Homo sapiens OX=9606 GN=CAV2 PE=1 SV=2	CAV2	18.291	7.4	2	1	1	1	1	1	1	1	1	4667600	4070500	1.315	0.801	0.609
P06312	Immunoglobulin kappa variable 4-1 OS=Homo sapiens OX=9606 GN=IGKV4-1 PE=1 SV=1	IGKV4-1	13.38	19.8	6	3	3	3	3	3	3	3	3	235100000	204060000	1.318	0.799	0.606
Q15517	Corneodesmosin OS=Homo sapiens OX=9606 GN=CDSN PE=1 SV=3	CDSN	51.522	3.4	2	1	1	1	1	1	1	1	1	1963300	1653900	1.336	0.786	0.588
P05089	Arginase-1 OS=Homo sapiens OX=9606 GN=ARG1 PE=1 SV=2	ARG1	34.735	3.4	2	1	1	1	1	1	1	1	1	1021900	855150	1.34	0.783	0.584
Q08AD1	Calmodulin-regulated spectrin-associated protein 2 OS=Homo sapiens OX=9606 GN=CAMSAP2 PE=1 SV=3	CAMSAP2	168.09	0.9	4	1	1	2	2	1	1	1	1	25764000	20144000	1.382	0.754	0.546
P31944	Caspase-14 OS=Homo sapiens OX=9606 GN=CASP14 PE=1 SV=2	CASP14	27.679	3.3	2	1	1	1	1	1	1	1	1	2098100	1629000	1.386	0.751	0.542
Q8TD23	Zinc finger protein 675 OS=Homo sapiens OX=9606 GN=ZNF675 PE=1 SV=3	ZNF675	66.298	1.4	2	1	1	1	1	1	1	1	1	3070700	2262400	1.418	0.729	0.514
Q01844	RNA-binding protein EWS OS=Homo sapiens OX=9606 GN=EWSR1 PE=1 SV=1	EWSR1	68.477	3.7	2	1	1	2	0	1	1	1	1	1429200	1043800	1.423	0.726	0.51
Q08554	Desmocollin-1 OS=Homo sapiens OX=9606 GN=DSC1 PE=1 SV=2	DSC1	99.986	2.6	4	2	2	3	1	2	2	2	2	1393800	1015600	1.424	0.725	0.509
Q8NC51	Plasminogen activator inhibitor 1 RNA-binding protein OS=Homo sapiens OX=9606 GN=SERBP1 PE=1 SV=2	SERBP1	44.965	15.2	8	5	5	4	4	5	5	5	5	6383100	4621800	1.428	0.722	0.506
P0DOX5	Immunoglobulin gamma-1 heavy chain OS=Homo sapiens OX=9606 PE=1 SV=2	--	49.328	2.7	0	1	1	0	0	1	1	1	1	468100	337320	1.431	0.72	0.503
P25311	Zinc-alpha-2-glycoprotein OS=Homo sapiens OX=9606 GN=AZGP1 PE=1 SV=2	AZGP1	34.258	3.4	2	1	1	1	1	1	1	1	1	1440300	1032700	1.434	0.718	0.501
Q08188	Protein-glutamine gamma-glutamyltransferase E OS=Homo sapiens OX=9606 GN=TGM3 PE=1 SV=4	TGM3	76.631	4.9	6	3	3	4	2	3	3	3	3	953370	656510	1.458	0.701	0.481
P62081	40S ribosomal protein S7 OS=Homo sapiens OX=9606 GN=RPS7 PE=1 SV=1	RPS7	22.127	21.6	5	3	3	2	3	3	2	3	2	4136000	2843900	1.459	0.7	0.48
P62269	40S ribosomal protein S18 OS=Homo sapiens OX=9606 GN=RPS18 PE=1 SV=3	RPS18	17.718	30.3	8	5	5	4	4	5	4	5	4	21895000	14938000	1.464	0.697	0.476
Q01469	Fatty acid-binding protein 5 OS=Homo sapiens OX=9606 GN=FABP5 PE=1 SV=3	FABP5	15.164	6.7	2	1	1	1	1	1	1	1	1	2850700	1920200	1.471	0.692	0.47
P62263	40S ribosomal protein S14 OS=Homo sapiens OX=9606 GN=RPS14 PE=1 SV=3	RPS14	16.273	7.3	1	1	1	0	1	1	1	1	1	12394000	8330200	1.472	0.691	0.469
P10599	Thioredoxin OS=Homo sapiens OX=9606 GN=TXN PE=1 SV=3	TXN	11.737	12.4	0	1	1	0	0	1	1	1	1	3544200	2359600	1.478	0.687	0.465
Q6UWP8	Suprabasin OS=Homo sapiens OX=9606 GN=SBSN PE=1 SV=2	SBSN	60.54	15.3	2	2	2	2	0	2	1	2	1	970880	628790	1.494	0.676	0.452
O15381	Nuclear valosin-containing protein-like OS=Homo sapiens OX=9606 GN=NVL PE=1 SV=1	NVL	95.05	1.4	1	1	1	0	1	1	1	1	1	481360	296960	1.523	0.656	0.431
P35813	Protein phosphatase 1A OS=Homo sapiens OX=9606 GN=PPM1A PE=1 SV=1	PPM1A	42.447	3.1	2	1	1	1	1	1	1	1	1	337960	204150	1.535	0.647	0.421
P60866	40S ribosomal protein S20 OS=Homo sapiens OX=9606 GN=RPS20 PE=1 SV=1	RPS20	13.373	19.3	3	2	2	2	1	2	2	2	2	15918000	7520400	1.672	0.552	0.33
P84090	Enhancer of rudimentary homolog OS=Homo sapiens OX=9606 GN=ERH PE=1 SV=1	ERH	12.259	10.6	2	1	1	1	1	1	1	1	1	22309000	10286000	1.685	0.542	0.322
Q86V81	THO complex subunit 4 OS=Homo sapiens OX=9606 GN=ALYREF PE=1 SV=3	ALYREF	26.888	21	4	3	3	3	1	3	1	3	1	3086700	800560	1.955	0.354	0.181
P46783	40S ribosomal protein S10 OS=Homo sapiens OX=9606 GN=RPS10 PE=1 SV=1	RPS10	18.898	44.8	8	7	7	6	2	7	4	7	4	25130000	5725600	2.005	0.319	0.159
A0A0J9YX35	Immunoglobulin heavy variable 3-64D OS=Homo sapiens OX=9606 GN=IGHV3-64D PE=3 SV=1	IGHV3-64D	12.822	9.4	0	1	1	0	0	1	1	1	1	0	0
O00429	Dynamin-1-like protein OS=Homo sapiens OX=9606 GN=DNM1L PE=1 SV=2	DNM1L	81.876	1.2	0	1	1	0	0	0	1	0	1	0	0
O15259	Nephrocystin-1 OS=Homo sapiens OX=9606 GN=NPHP1 PE=1 SV=1	NPHP1	83.298	1.1	0	1	1	0	0	1	1	1	1	0	0
O15294	UDP-N-acetylglucosamine--peptide N-acetylglucosaminyltransferase 110 kDa subunit OS=Homo sapiens OX=9606 GN=OGT PE=1 SV=3	OGT	116.92	1.9	0	1	1	0	0	0	1	0	1	0	0
O60423	Phospholipid-transporting ATPase IK OS=Homo sapiens OX=9606 GN=ATP8B3 PE=2 SV=4	ATP8B3	146.75	1	0	1	1	0	0	1	1	1	1	0	0
O75116	Rho-associated protein kinase 2 OS=Homo sapiens OX=9606 GN=ROCK2 PE=1 SV=4	ROCK2	160.9	1.1	0	1	1	0	0	1	1	1	1	0	0
O75417	DNA polymerase theta OS=Homo sapiens OX=9606 GN=POLQ PE=1 SV=2	POLQ	289.62	0.3	0	1	1	0	0	1	1	1	1	0	0
O75691	Small subunit processome component 20 homolog OS=Homo sapiens OX=9606 GN=UTP20 PE=1 SV=3	UTP20	318.38	0.4	0	1	1	0	0	0	1	0	1	0	0
O95436	Sodium-dependent phosphate transport protein 2B OS=Homo sapiens OX=9606 GN=SLC34A2 PE=1 SV=3	SLC34A2	75.759	1.7	0	1	1	0	0	1	1	1	1	0	0
P02452	Collagen alpha-1(I) chain OS=Homo sapiens OX=9606 GN=COL1A1 PE=1 SV=5	COL1A1	138.94	2.3	2	2	2	2	0	2	0	2	0	219400	0	1.231
P04279	Semenogelin-1 OS=Homo sapiens OX=9606 GN=SEMG1 PE=1 SV=2	SEMG1	52.13	55.8	35	32	30	35	0	32	0	30	0	35937000	0	1.231
P06454	Prothymosin alpha OS=Homo sapiens OX=9606 GN=PTMA PE=1 SV=2	PTMA	12.203	21.6	0	2	2	0	0	2	0	2	0	802190	0	1.231
P08151	Zinc finger protein GLI1 OS=Homo sapiens OX=9606 GN=GLI1 PE=1 SV=1	GLI1	117.9	1.2	0	1	1	0	0	1	1	1	1	0	0
P20929	Nebulin OS=Homo sapiens OX=9606 GN=NEB PE=1 SV=5	NEB	772.91	0.1	0	1	1	0	0	1	0	1	0	0	0
P25705	ATP synthase subunit alpha, mitochondrial OS=Homo sapiens OX=9606 GN=ATP5F1A PE=1 SV=1	ATP5F1A	59.75	1.3	1	1	1	0	1	0	1	0	1	0	0
P34896	Serine hydroxymethyltransferase, cytosolic OS=Homo sapiens OX=9606 GN=SHMT1 PE=1 SV=1	SHMT1	53.082	1.9	0	1	1	0	0	0	1	0	1	0	0
P35268	60S ribosomal protein L22 OS=Homo sapiens OX=9606 GN=RPL22 PE=1 SV=2	RPL22	14.787	8.6	1	1	1	1	0	1	0	1	0	2500100	0	1.231
P35637	RNA-binding protein FUS OS=Homo sapiens OX=9606 GN=FUS PE=1 SV=1	FUS	53.425	4.6	1	1	1	1	0	1	0	1	0	1207700	0	1.231
P35663	Cylicin-1 OS=Homo sapiens OX=9606 GN=CYLC1 PE=2 SV=2	CYLC1	74.241	2.3	0	1	1	0	0	1	1	1	1	0	0
P39019	40S ribosomal protein S19 OS=Homo sapiens OX=9606 GN=RPS19 PE=1 SV=2	RPS19	16.06	9	0	1	1	0	0	1	0	1	0	816660	0	1.231
P49750	YLP motif-containing protein 1 OS=Homo sapiens OX=9606 GN=YLPM1 PE=1 SV=4	YLPM1	241.64	0.5	0	1	1	0	0	0	1	0	1	0	0
P51606	N-acylglucosamine 2-epimerase OS=Homo sapiens OX=9606 GN=RENBP PE=1 SV=2	RENBP	48.83	4.9	0	1	1	0	0	1	1	1	1	0	0
P60900	Proteasome subunit alpha type-6 OS=Homo sapiens OX=9606 GN=PSMA6 PE=1 SV=1	PSMA6	27.399	5.3	1	1	1	1	0	1	0	1	0	636820	0	1.231
Q9UNX3	60S ribosomal protein L26-like 1 OS=Homo sapiens OX=9606 GN=RPL26L1 PE=1 SV=1	RPL26L1	17.256	5.5	2	1	1	1	1	1	1	1	1	0	0
P63104	14-3-3 protein zeta/delta OS=Homo sapiens OX=9606 GN=YWHAZ PE=1 SV=1	YWHAZ	27.745	9.8	2	2	1	1	1	1	2	1	1	0	0
P69892	Hemoglobin subunit gamma-2 OS=Homo sapiens OX=9606 GN=HBG2 PE=1 SV=2	HBG2	16.126	15.6	1	2	1	1	0	2	1	1	0	0	0
Q02383	Semenogelin-2 OS=Homo sapiens OX=9606 GN=SEMG2 PE=1 SV=1	SEMG2	65.444	47.8	23	21	19	23	0	21	0	19	0	14410000	0	1.231
Q02487	Desmocollin-2 OS=Homo sapiens OX=9606 GN=DSC2 PE=1 SV=1	DSC2	99.961	1	0	1	1	0	0	1	0	1	0	0	0
Q07666	KH domain-containing, RNA-binding, signal transduction-associated protein 1 OS=Homo sapiens OX=9606 GN=KHDRBS1 PE=1 SV=1	KHDRBS1	48.227	3.2	1	1	1	1	0	1	0	1	0	500290	0	1.231
Q53HC5	Kelch-like protein 26 OS=Homo sapiens OX=9606 GN=KLHL26 PE=1 SV=2	KLHL26	68.139	4.2	0	1	1	0	0	1	1	1	1	0	0
Q562F6	Shugoshin 2 OS=Homo sapiens OX=9606 GN=SGO2 PE=1 SV=2	SGO2	144.74	1.1	0	1	1	0	0	0	1	0	1	0	0
Q6EIG7	C-type lectin domain family 6 member A OS=Homo sapiens OX=9606 GN=CLEC6A PE=1 SV=1	CLEC6A	23.998	5.3	0	1	1	0	0	1	1	1	1	0	0
Q6N069	N-alpha-acetyltransferase 16, NatA auxiliary subunit OS=Homo sapiens OX=9606 GN=NAA16 PE=1 SV=2	NAA16	101.46	1.6	0	1	1	0	0	1	0	1	0	0	0
Q6PD62	RNA polymerase-associated protein CTR9 homolog OS=Homo sapiens OX=9606 GN=CTR9 PE=1 SV=1	CTR9	133.5	1.1	0	1	1	0	0	1	1	1	1	0	0
Q6UB98	Ankyrin repeat domain-containing protein 12 OS=Homo sapiens OX=9606 GN=ANKRD12 PE=1 SV=3	ANKRD12	235.65	0.7	0	1	1	0	0	0	1	0	1	0	0
Q6ZW61	Bardet-Biedl syndrome 12 protein OS=Homo sapiens OX=9606 GN=BBS12 PE=1 SV=2	BBS12	79.084	2.3	0	1	1	0	0	1	1	1	1	0	0
Q7Z333	Probable helicase senataxin OS=Homo sapiens OX=9606 GN=SETX PE=1 SV=4	SETX	302.88	0.6	0	1	1	0	0	1	1	1	1	0	0
Q86TI4	WD repeat-containing protein 86 OS=Homo sapiens OX=9606 GN=WDR86 PE=2 SV=3	WDR86	40.731	3.5	0	1	1	0	0	1	1	1	1	0	0
Q86UK5	Limbin OS=Homo sapiens OX=9606 GN=EVC2 PE=2 SV=1	EVC2	147.95	0.8	0	1	1	0	0	1	0	1	0	0	0
Q86VF7	Nebulin-related-anchoring protein OS=Homo sapiens OX=9606 GN=NRAP PE=1 SV=2	NRAP	197.07	1.1	0	1	1	0	0	1	1	1	1	0	0
Q86XT2	Vacuolar protein sorting-associated protein 37D OS=Homo sapiens OX=9606 GN=VPS37D PE=1 SV=2	VPS37D	27.729	7.6	0	1	1	0	0	1	1	1	1	0	0
Q8IUA7	ATP-binding cassette sub-family A member 9 OS=Homo sapiens OX=9606 GN=ABCA9 PE=1 SV=1	ABCA9	184.36	0.5	0	1	1	0	0	1	1	1	1	0	0
Q8IV33	Uncharacterized protein KIAA0825 OS=Homo sapiens OX=9606 GN=KIAA0825 PE=1 SV=3	KIAA0825	147.73	1.1	0	1	1	0	0	1	1	1	1	0	0
Q8IWJ2	GRIP and coiled-coil domain-containing protein 2 OS=Homo sapiens OX=9606 GN=GCC2 PE=1 SV=4	GCC2	195.91	1.1	0	1	1	0	0	0	1	0	1	0	0
Q8IWN7	Retinitis pigmentosa 1-like 1 protein OS=Homo sapiens OX=9606 GN=RP1L1 PE=2 SV=5	RP1L1	252.29	0.4	0	1	1	0	0	1	1	1	1	0	0
Q8IXI2	Mitochondrial Rho GTPase 1 OS=Homo sapiens OX=9606 GN=RHOT1 PE=1 SV=2	RHOT1	70.783	1.1	1	1	1	1	0	1	0	1	0	0	0
Q8N1B4	Vacuolar protein sorting-associated protein 52 homolog OS=Homo sapiens OX=9606 GN=VPS52 PE=1 SV=1	VPS52	82.22	1	1	1	1	0	1	0	1	0	1	0	0
Q8NBJ4	Golgi membrane protein 1 OS=Homo sapiens OX=9606 GN=GOLM1 PE=1 SV=1	GOLM1	45.333	4.5	0	1	1	0	0	0	1	0	1	0	0
Q8NE71	ATP-binding cassette sub-family F member 1 OS=Homo sapiens OX=9606 GN=ABCF1 PE=1 SV=2	ABCF1	95.925	1.8	1	1	1	1	0	1	0	1	0	61499	0	1.231
Q8TDB8	Solute carrier family 2, facilitated glucose transporter member 14 OS=Homo sapiens OX=9606 GN=SLC2A14 PE=1 SV=1	SLC2A14	56.319	3.7	0	1	1	0	0	1	0	1	0	0	0
Q8TDY2	RB1-inducible coiled-coil protein 1 OS=Homo sapiens OX=9606 GN=RB1CC1 PE=1 SV=3	RB1CC1	183.09	1.1	0	1	1	0	0	1	1	1	1	0	0
Q8TF66	Leucine-rich repeat-containing protein 15 OS=Homo sapiens OX=9606 GN=LRRC15 PE=2 SV=2	LRRC15	64.365	2.8	0	1	1	0	0	1	1	1	1	0	0
Q96BW1	Uracil phosphoribosyltransferase homolog OS=Homo sapiens OX=9606 GN=UPRT PE=1 SV=1	UPRT	33.786	5.2	0	1	1	0	0	1	1	1	1	0	0
Q96EV2	RNA-binding protein 33 OS=Homo sapiens OX=9606 GN=RBM33 PE=1 SV=3	RBM33	129.98	0.6	2	1	1	1	1	1	1	1	1	0	0
Q96JN8	Neuralized-like protein 4 OS=Homo sapiens OX=9606 GN=NEURL4 PE=1 SV=2	NEURL4	166.9	0.5	2	1	1	1	1	1	1	1	1	0	0
Q96M86	Dynein heavy chain domain-containing protein 1 OS=Homo sapiens OX=9606 GN=DNHD1 PE=2 SV=2	DNHD1	533.64	0.2	0	1	1	0	0	1	1	1	1	0	0
Q99487	Platelet-activating factor acetylhydrolase 2, cytoplasmic OS=Homo sapiens OX=9606 GN=PAFAH2 PE=1 SV=1	PAFAH2	44.035	3.3	0	1	1	0	0	1	1	1	1	0	0
Q99598	Translin-associated protein X OS=Homo sapiens OX=9606 GN=TSNAX PE=1 SV=1	TSNAX	33.112	8.6	0	1	1	0	0	1	0	1	0	0	0
Q99607	ETS-related transcription factor Elf-4 OS=Homo sapiens OX=9606 GN=ELF4 PE=1 SV=1	ELF4	70.729	2.1	0	1	1	0	0	1	1	1	1	0	0
Q9BRU9	rRNA-processing protein UTP23 homolog OS=Homo sapiens OX=9606 GN=UTP23 PE=1 SV=2	UTP23	28.402	3.6	0	1	1	0	0	1	1	1	1	0	0
Q9H579	Protein MROH8 OS=Homo sapiens OX=9606 GN=MROH8 PE=2 SV=2	MROH8	54.816	1.4	0	1	1	0	0	1	1	1	1	0	0
Q9H6N6	Putative uncharacterized protein MYH16 OS=Homo sapiens OX=9606 GN=MYH16 PE=1 SV=2	MYH16	128.29	1.2	0	1	1	0	0	1	1	1	1	0	0
Q9H8V3	Protein ECT2 OS=Homo sapiens OX=9606 GN=ECT2 PE=1 SV=4	ECT2	103.5	1.8	0	1	1	0	0	1	1	1	1	0	0
Q9HC56	Protocadherin-9 OS=Homo sapiens OX=9606 GN=PCDH9 PE=1 SV=2	PCDH9	136.06	0.6	2	1	1	0	2	0	1	0	1	0	0
Q9NPQ8	Synembryn-A OS=Homo sapiens OX=9606 GN=RIC8A PE=1 SV=3	RIC8A	59.709	2.8	0	1	1	0	0	1	1	1	1	0	0
Q9NYY3	Serine/threonine-protein kinase PLK2 OS=Homo sapiens OX=9606 GN=PLK2 PE=1 SV=3	PLK2	78.236	2.2	0	1	1	0	0	1	1	1	1	0	0
Q9P278	Folliculin-interacting protein 2 OS=Homo sapiens OX=9606 GN=FNIP2 PE=1 SV=2	FNIP2	122.11	1.4	0	1	1	0	0	1	1	1	1	0	0
Q9UH65	Switch-associated protein 70 OS=Homo sapiens OX=9606 GN=SWAP70 PE=1 SV=1	SWAP70	68.997	2.1	0	1	1	0	0	1	1	1	1	0	0
Q9UHD8	Septin-9 OS=Homo sapiens OX=9606 GN=SEPTIN9 PE=1 SV=2	SEPTIN9	65.401	2.9	0	1	1	0	0	1	1	1	1	0	0
Q9UPN3	Microtubule-actin cross-linking factor 1, isoforms 1/2/3/5 OS=Homo sapiens OX=9606 GN=MACF1 PE=1 SV=4	MACF1	838.3	0.2	0	1	1	0	0	1	1	1	1	0	0
Q9Y5B6	PAX3- and PAX7-binding protein 1 OS=Homo sapiens OX=9606 GN=PAXBP1 PE=1 SV=2	PAXBP1	104.8	0.9	0	1	1	0	0	1	1	1	1	0	0
Q9Y6Y1	Calmodulin-binding transcription activator 1 OS=Homo sapiens OX=9606 GN=CAMTA1 PE=1 SV=4	CAMTA1	183.67	0.7	0	1	1	0	0	1	1	1	1	0	0
